# Supplementary material
Source: PubMed Central journal article supplement (PMC7317649)
Supplement: NIHMS1600344-supplement-Supplemental_Figures.pdf [file NIHMS1600344-supplement-Supplemental_Figures.pdf]

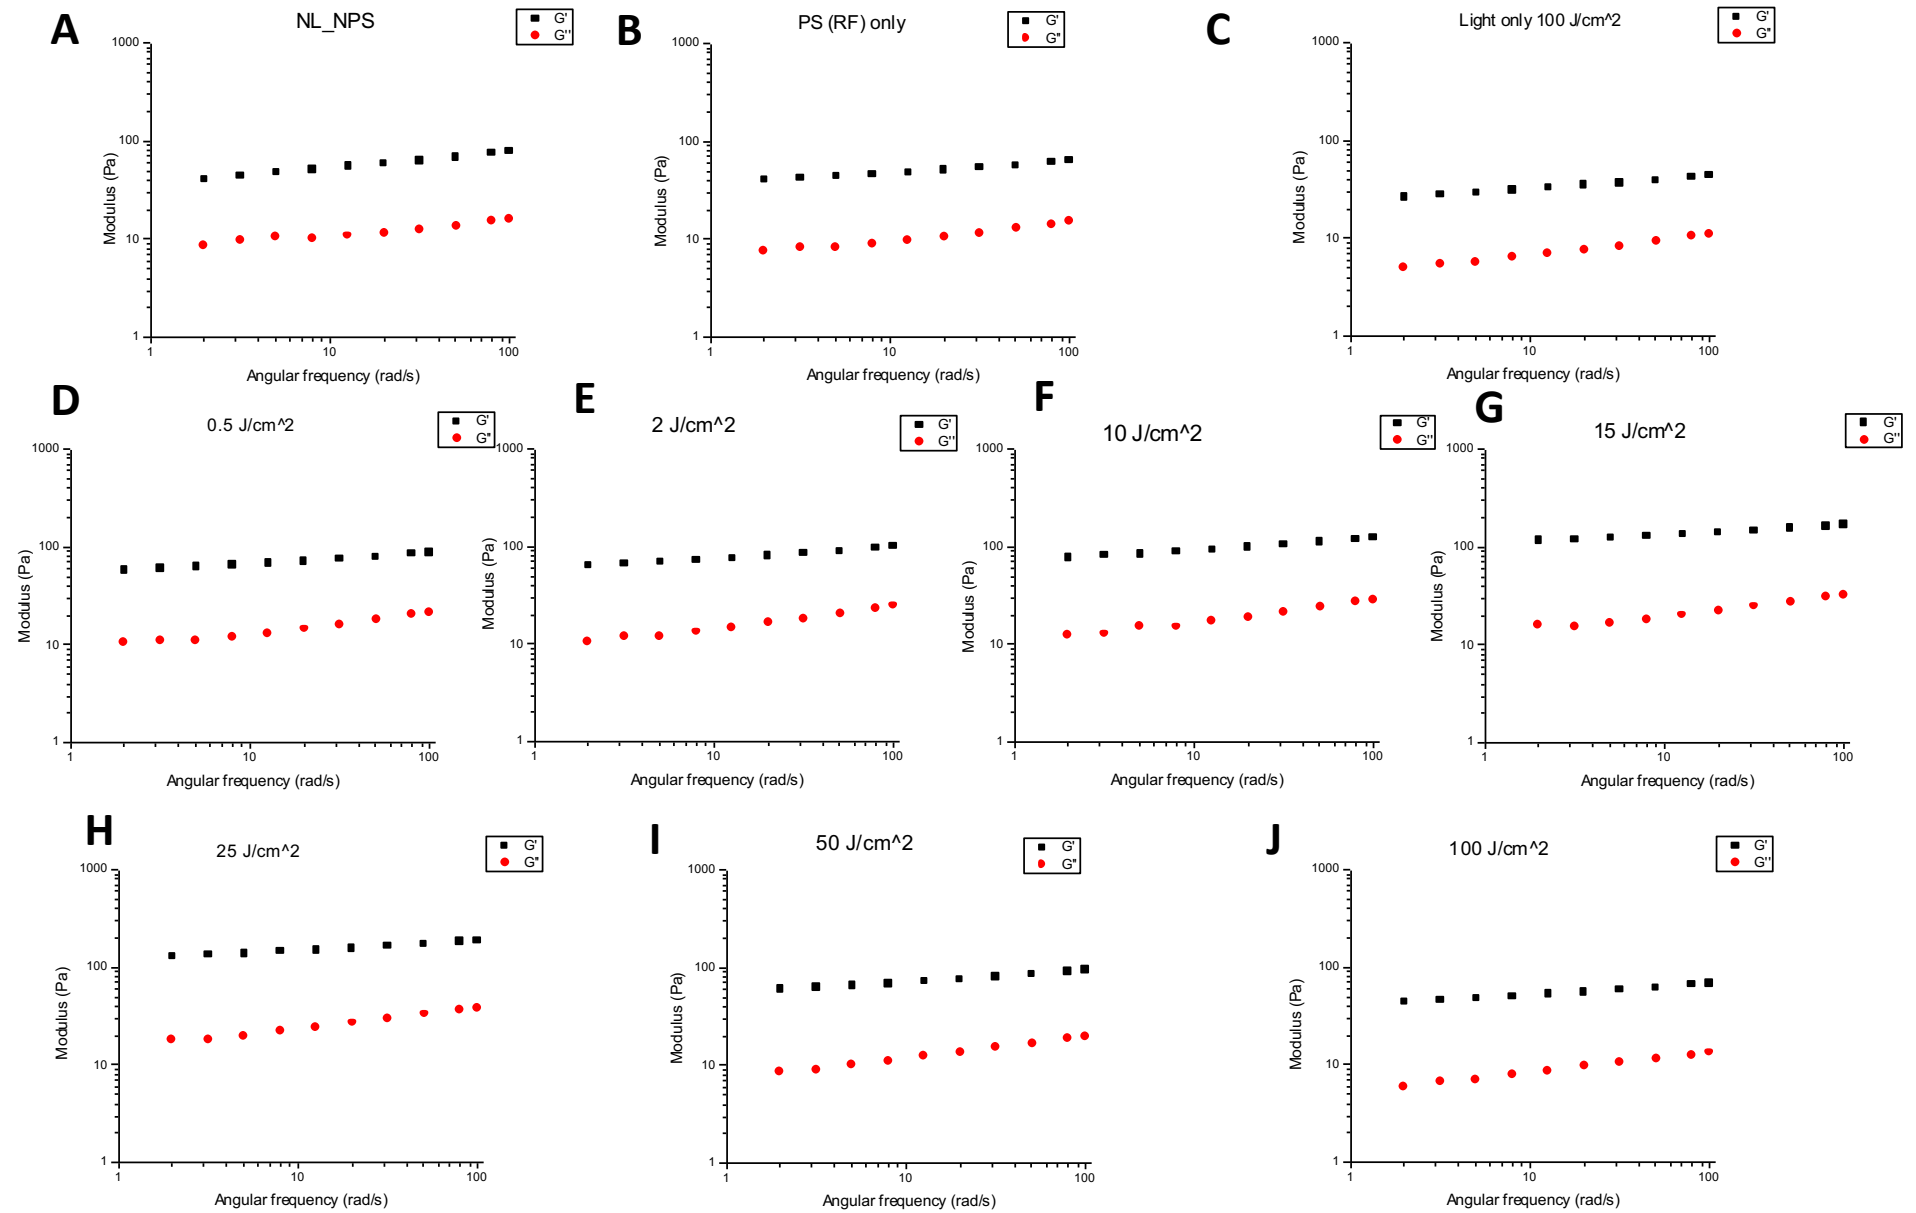

Supplemental Figure 1: A) – J) Representative oscillatory shear frequency sweep data for each photocrosslinking and control condition

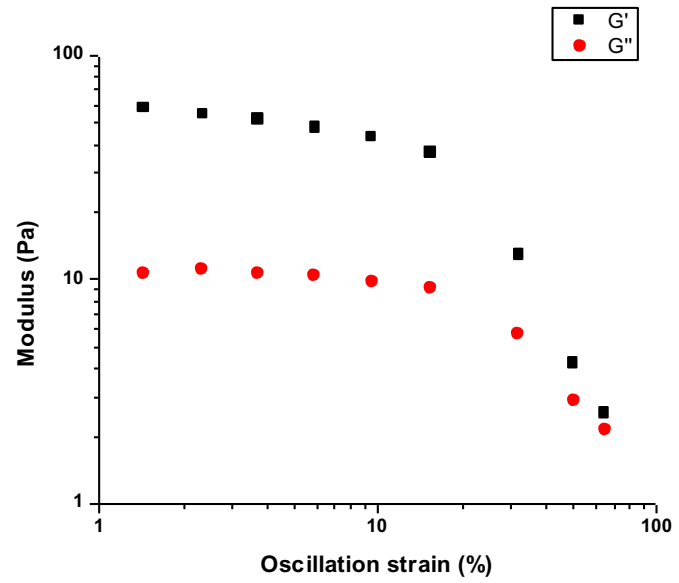

Supplemental Figure 2: Representative strain sweep (shown for RF crosslinking light dose of  $0.5 \text{ J/cm}^2$  at fixed frequency of  $= 20 \text{ rad/s}$  shows end of linear response (in this case around 10% strain) and material failure used to estimate yield stress.
